# Supplementary material
Source: HighWire-hosted journal article supplement (https://bmjopen.bmj.com/content/10/2/e034887)
Supplement: inline-supplementary-material-1 [file inline-supplementary-material-1.pdf]

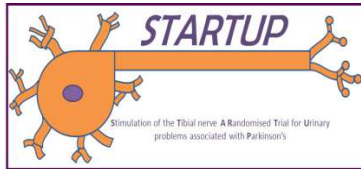

STARTUP Research office  
 NMAHP Research Unit  
 Glasgow Caledonian University  
 Glasgow G4 0BA  
 Tel: 0141 331 3504  
 Email: Startuptrial@gcu.ac.uk

Trust LOGO, address  
 & contact details

**Trial Ref No: 18/ES/0042**

**Participant ID:**

# Consent Form

## A study to assess if transcutaneous tibial nerve stimulation (TTNS) will help with urine leakage in people who have Parkinson's

**By signing this form and initialling each box I agree that:**

**Please initial  
 all boxes**

- I have read and understood the Information Sheet (version X dated XXX) for the above study. I have had the opportunity to consider the information, ask questions and have had them answered satisfactorily.
- My participation is voluntary and that I am free to withdraw at any time, without giving any reason, without my care or legal rights being affected.
- Relevant sections of my medical notes and data collected during the study, may be looked at by individuals from the research office, from regulatory authorities or from the NHS Trust, where it is relevant to my taking part in the STARTUP study. I give permission for these individuals to have access to my records.
- It may not be possible to remove my data from the study once the data analysis has started and results are published.
- I will be randomised and will have a 50% chance of receiving active tibial nerve stimulation and a 50% chance of receiving non-active tibial nerve stimulation
- All relevant data and my contact details can be stored, confidentially and securely by the study offices at Glasgow Caledonian University.

**1 for participant; 1 for STARTUP study office; 1 for NHS notes; 1 for study file**

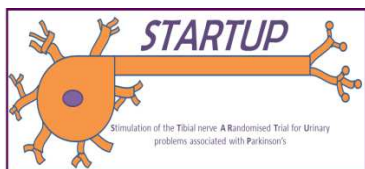

STARTUP Research office  
 NMAHP Research Unit  
 Glasgow Caledonian University  
 Glasgow G4 0BA  
 Tel: 0141 331 3504  
 Email: Startuptrial@gcu.ac.uk

Trust LOGO, address  
 & contact details

**Trial Ref No: 18/ES/0042**

**Participant ID:**

**By signing this form and initialling each box I agree that:**

**Please initial  
 all boxes**

- I agree to take part in this study
- I agree to my GP being informed of my participation in the study



Your signature (participant) \_\_\_\_\_ Date \_\_\_\_\_

Your name in block capitals \_\_\_\_\_

**To be completed by local STARTUP researcher taking consent**

I confirm that I have explained to the person named above, the nature and purpose of the STARTUP trial and the treatments involved

Your signature \_\_\_\_\_ Date \_\_\_\_\_

Your name in block capitals \_\_\_\_\_

**1 for participant; 1 for STARTUP study office; 1 for NHS notes; 1 for study file**
